# Supplementary material for: An efficient titanium foil based perovskite solar cell: using a titanium dioxide nanowire array anode and transparent poly(3,4-ethylenedioxythiophene) electrode
Source: Royal Society of Chemistry journal article supplement (doi:10.1039/c5ra23430a), 2015-12-23
Supplement: c5ra23430a1.pdf [file c5ra23430a1.pdf]

Supporting Information for

**Efficient titanium foil based perovskite solar cell: Using titanium dioxide nanowire arrays anode and transparent poly(3,4-ethylenedioxythiophene) electrode**

Yaoming Xiao,<sup>a,b,\*</sup> Gaoyi Han,<sup>a,b</sup> Haihan Zhou,<sup>a,b</sup> and Jihuai Wu<sup>c</sup>

<sup>a</sup>Institute of Molecular Science, Innovation Center of Chemistry and Molecular Science, Shanxi University, Taiyuan 030006, P. R. China.

<sup>b</sup>Key Laboratory of Materials for Energy Conversion and Storage of Shanxi Province, Taiyuan 030006, P. R. China.

<sup>c</sup>Institute of Materials Physical Chemistry, Huaqiao University, Quanzhou 362021, China.

[\*] Corresponding author

E-mail: [ymxiao@sxu.edu.cn](mailto:ymxiao@sxu.edu.cn) (Yaoming Xiao).

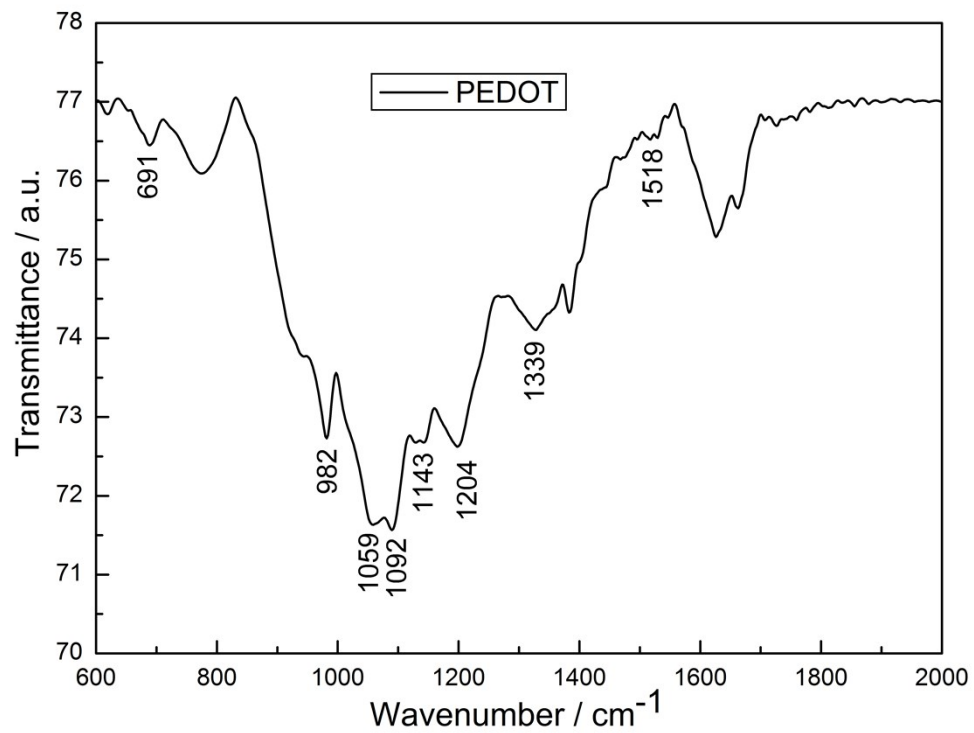

**Fig. S1** FTIR spectrum of the PEDOT.

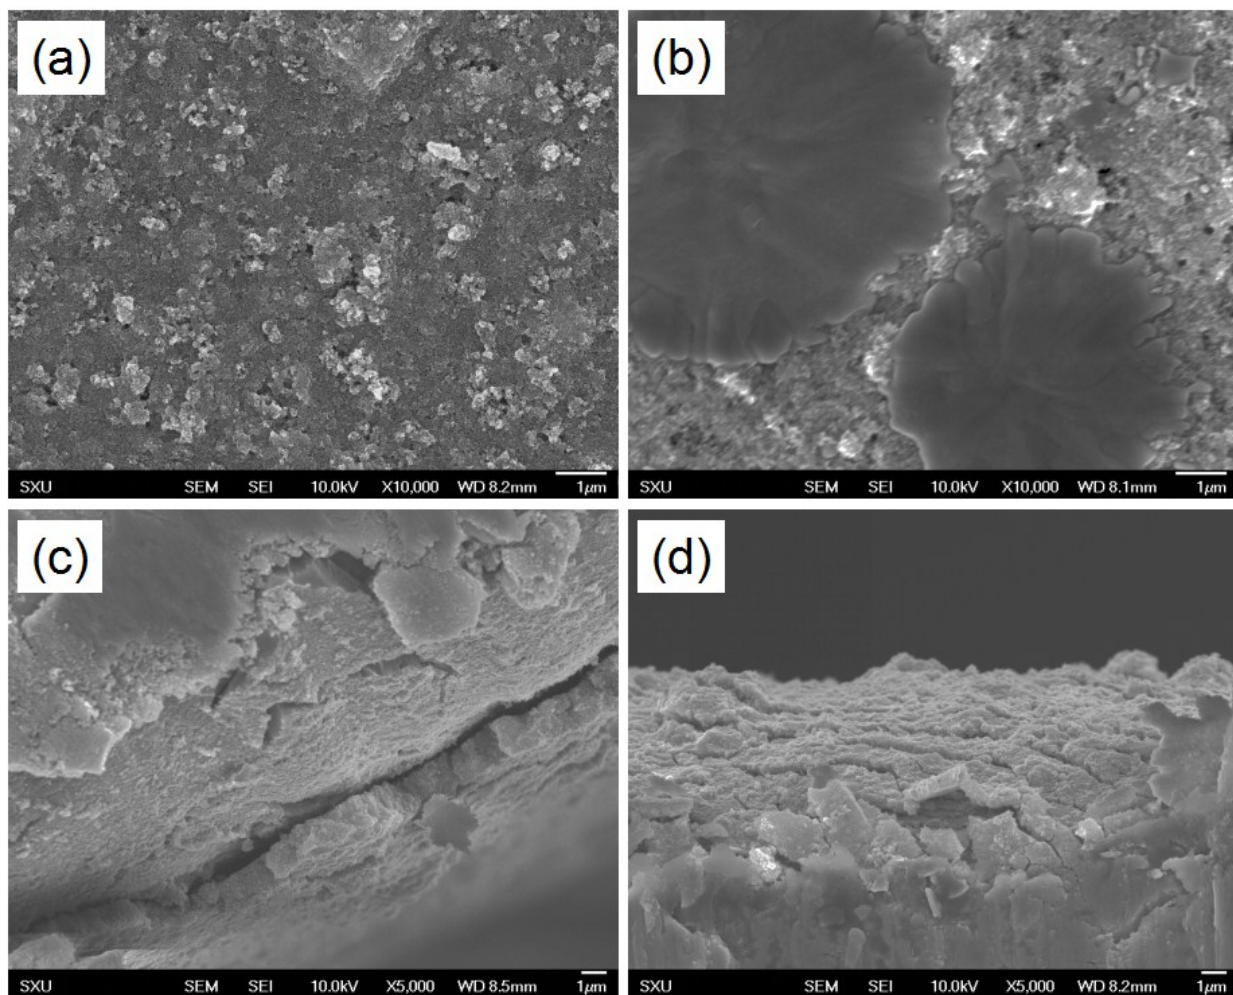

**Fig. S2** Top-view SEM images of the pure TNPs (a) and TNP-CH<sub>3</sub>NH<sub>3</sub>PbI<sub>3</sub> (b); Cross-sectional SEM images of the pure TNPs (c) and TNP-CH<sub>3</sub>NH<sub>3</sub>PbI<sub>3</sub> (d).

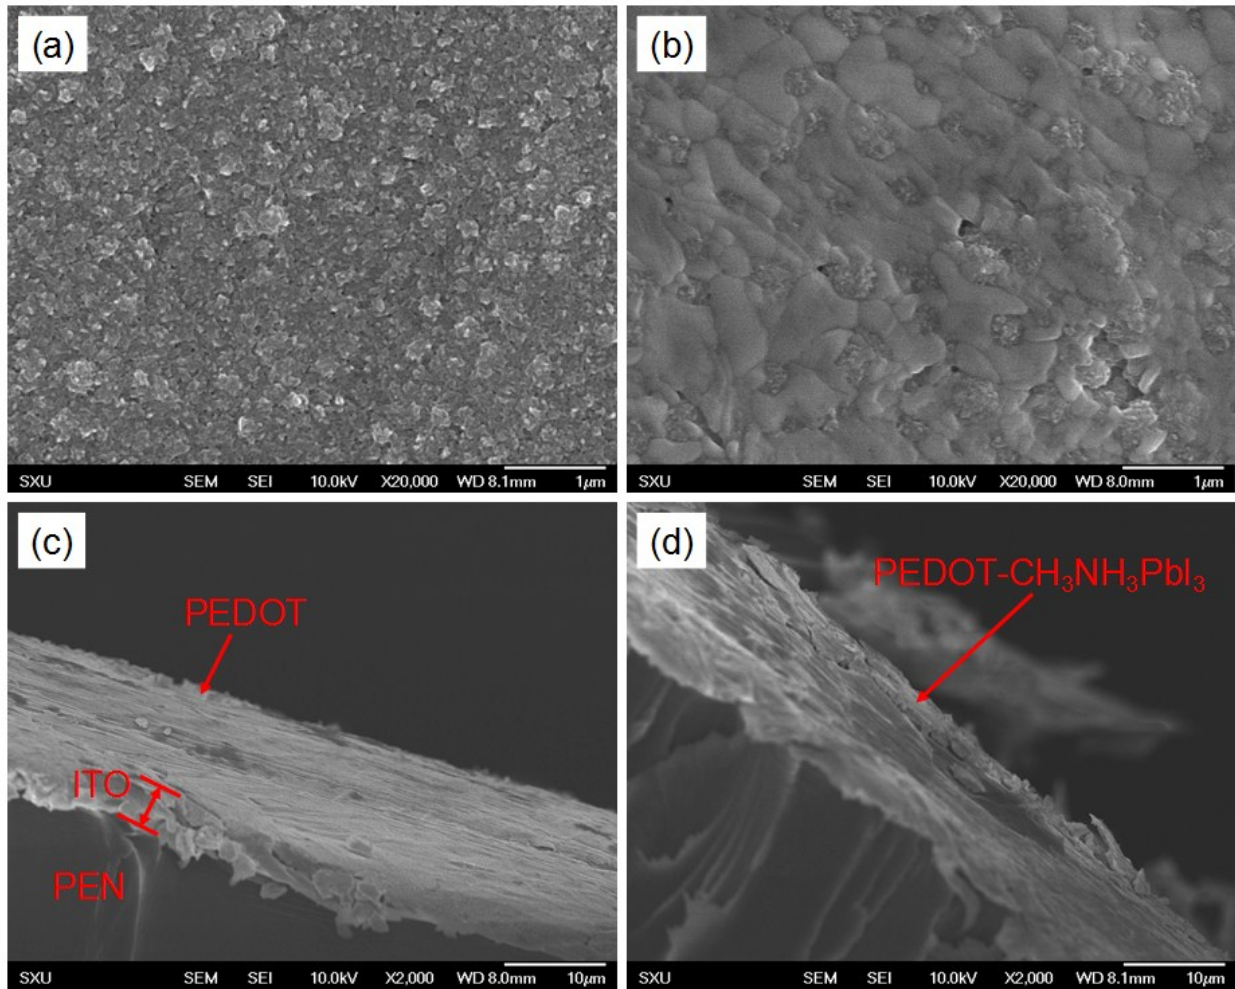

**Fig. S3** Top-view SEM images of the PEDOT (a) and PEDOT-CH<sub>3</sub>NH<sub>3</sub>PbI<sub>3</sub> (b) with a bar of 1 μm; Cross-sectional SEM images of the PEDOT (c) and PEDOT-CH<sub>3</sub>NH<sub>3</sub>PbI<sub>3</sub> (d) with a bar of 10 μm.

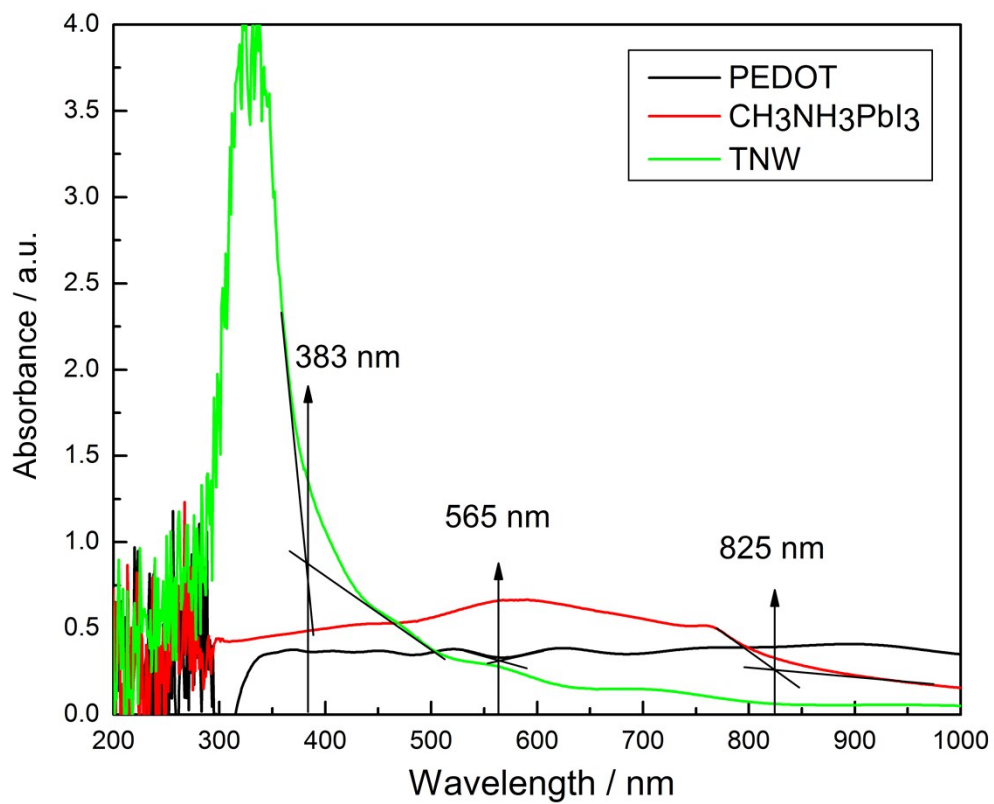

**Fig. S4** UV-Vis absorption spectra of the PEDOT, CH<sub>3</sub>NH<sub>3</sub>PbI<sub>3</sub>, and TNW, respectively.

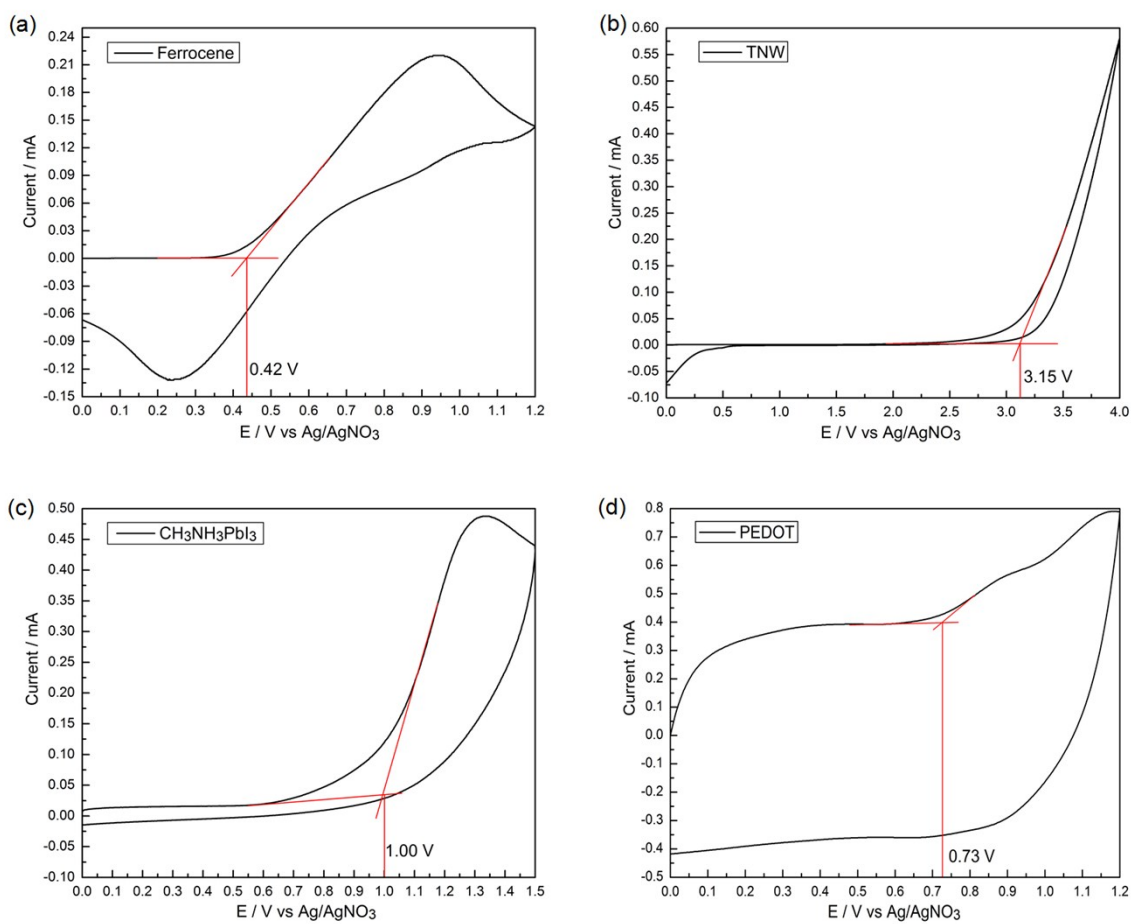

**Fig. S5** CVs of Ferrocene (a), TNW (b),  $CH_3NH_3PbI_3$  (c), and PEDOT (d), respectively.
